# Supplementary material for: On the Electronic Structure of 2H-MoS2: Correlating DFT Calculations and In-Situ Mechanical Bending on TEM
Source: MDPI journal article supplement (doi:10.3390/ma15196732), 2022-09-28
Supplement: s1 [file s1]

# On the electronic structure of 2H-MoS<sub>2</sub>: Correlating observations made by in-situ mechanical bending on TEM

Manuel Ramos, Oscar A. López-Galán, Javier Polanco, Miguel José Yacamán

## SUPPLEMENTAL MATERIALS

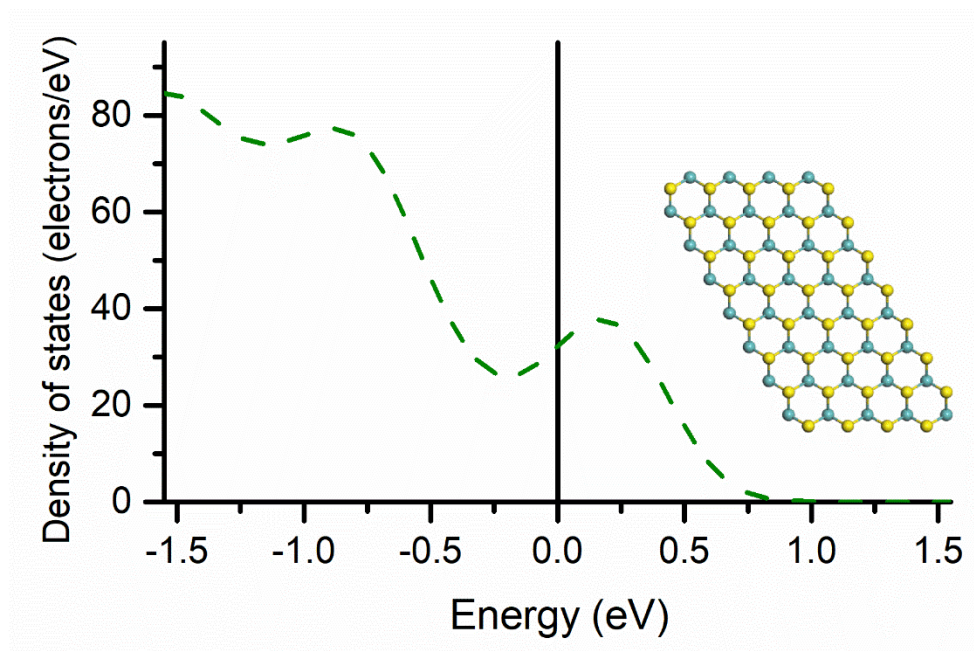

Figure S1. Total density of states of the 2H-MoS<sub>2</sub> molecular layer with no bending. Cyan balls represent the position of molybdenum and yellow balls represent sulfur.

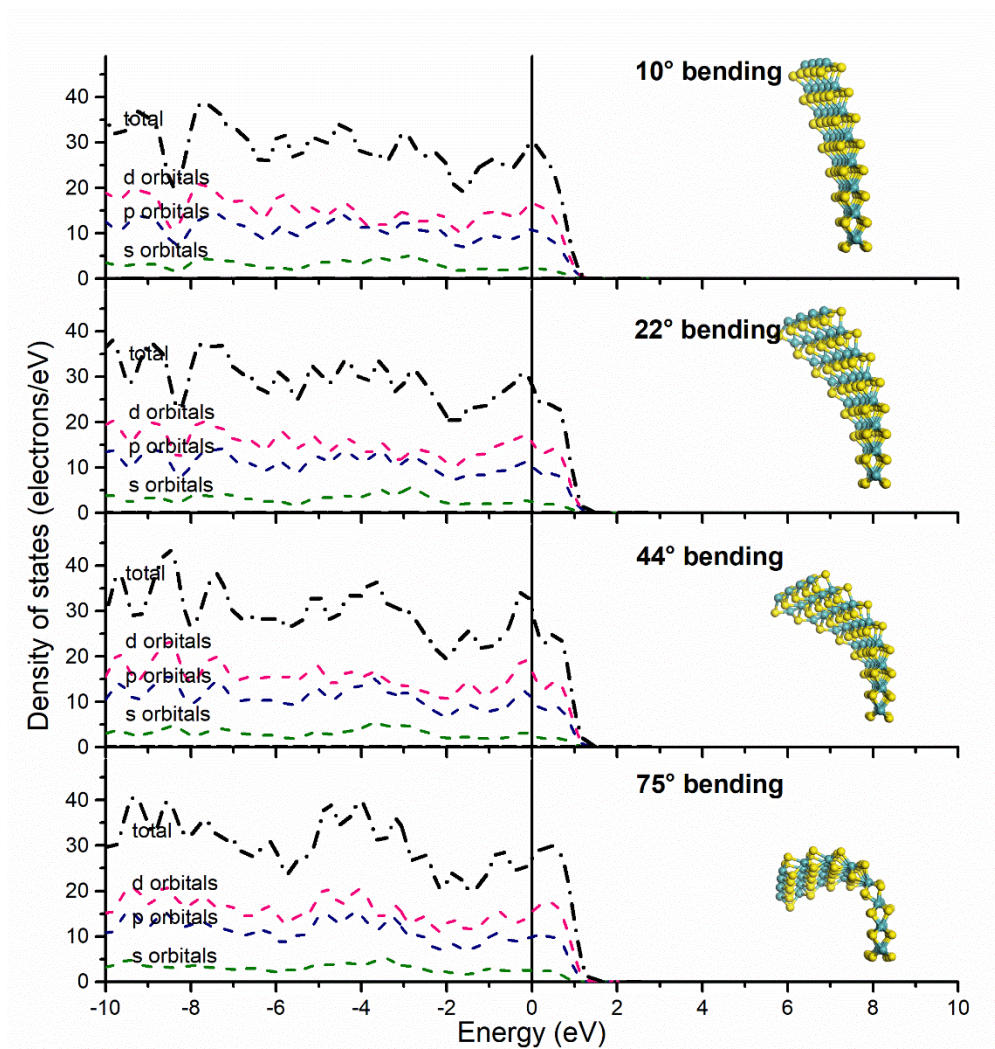

Figure S2. Total and partial density of states computed for the MoS<sub>2</sub> molecular model at 10°, 22°, 44° and 75° of mechanical bending from -10 eV to 10 eV. The observations made by in-situ HRTEM technique, showing the induced bending curvature for 2H-MoS<sub>2</sub> layers, were used to extract the molecular models used for the calculations. Cyan balls represent the position of molybdenum and yellow balls represent sulfur.
